# Supplementary material for: Fabrication of flexible silicon nanowires by self-assembled metal assisted chemical etching for surface enhanced Raman spectroscopy
Source: Royal Society of Chemistry journal article supplement (doi:10.1039/c6ra20323j), 2016-01-01
Supplement: c6ra20323j1.pdf [file c6ra20323j1.pdf]

## Supplementary Information

### **Fabrication of Flexible Silicon Nanowires by Self-assembled Metal Assisted Chemical Etching for Surface Enhanced Raman Spectroscopy**

S. A. Kara<sup>a,b,d</sup>, A. Keffous<sup>b</sup>, A. M. Giovannozzi<sup>\*c</sup>, A. M. Rossi<sup>c</sup>, E. Cara<sup>d</sup>, L. D'Ortenzi<sup>d</sup>, K. Sparnacchi<sup>e</sup>,  
L. Boarino<sup>d</sup>, N. Gabouze<sup>b</sup> and S.Soukane<sup>a</sup>

<sup>a</sup> *Department of Chemical Engineering, Faculty of Technology, University of Blida 1, route de SOUMÂA B.P. 270, 09000 Blida, Algeria*

<sup>b</sup> *Centre de Recherche en Technologie des Semi-conducteurs pour l'Energétique (CRTSE), Thin Films, Surface and Interface Division, 02, Bd. Dr. Frantz Fanon, B.P. 140, Alger-7 Merveilles, 16038 Algiers, Algeria*

<sup>c</sup> *Department of Quality of Life, INRiM, Strada delle Cacce, 10135, Turin, Italy*

<sup>d</sup> *Nanofacility Piemonte, National Institute of Metrologic Research (INRiM), Turin, Italy*

<sup>e</sup> *Dipartimento di Scienze e Innovazione Tecnologica, Università del Piemonte Orientale "Avogadro", INSTM, UdR Alessandria, Viale T. Michel 11, Alessandria, Italy*

*\*Corresponding author: a.giovannozzi@inrim.it*

### S.1 SEM Images of SiNWs with different aspect ratios

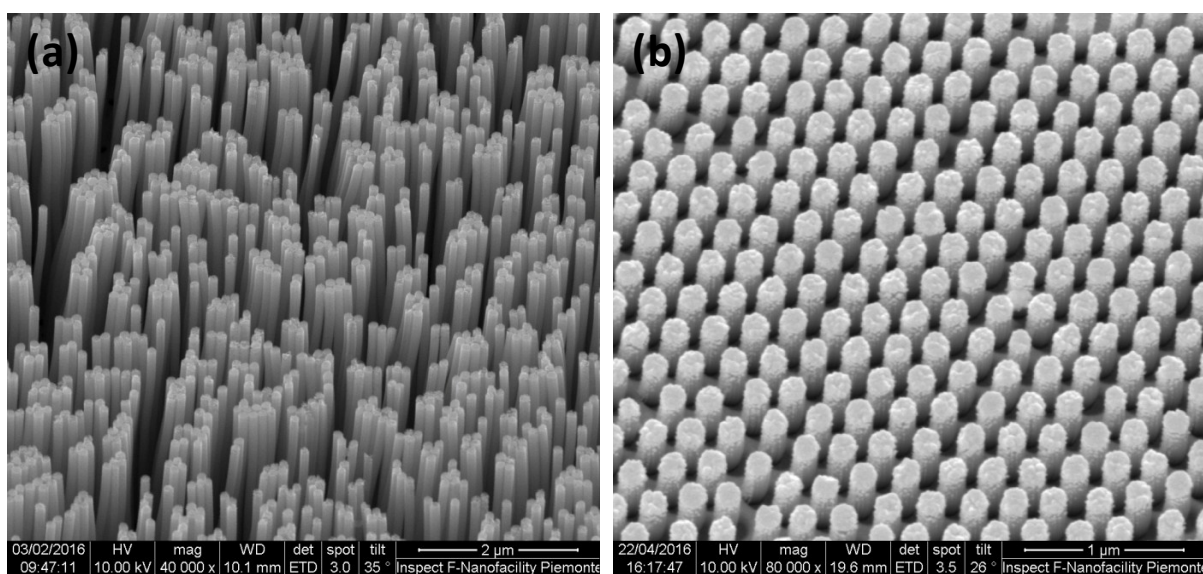

**Fig. S1** (a) leaned SiNWs (aspect ratio  $> 1:10$ ) obtained with an etching time of 130 s. (b) SiNWs (aspect ratio 1:5) coated with 80 nm of gold. These short wires were employed to demonstrate the non leaning effect occurs during water evaporation.

## S.2 SEM images of leaned SiNWs with aspect ratio of 1:10

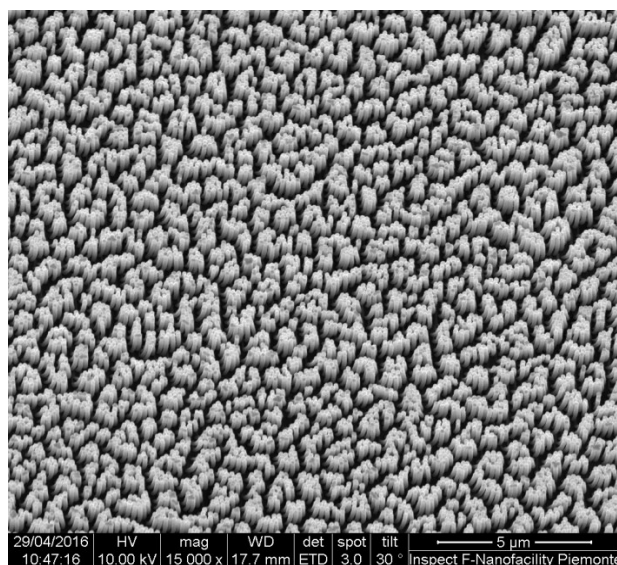

**Fig S2** Leaned SiNWs obtained after water evaporation on large area with a potential high number of clustered Raman hot spots.

### S3 Raman spectra recorded after substrates immersion in Mel solution

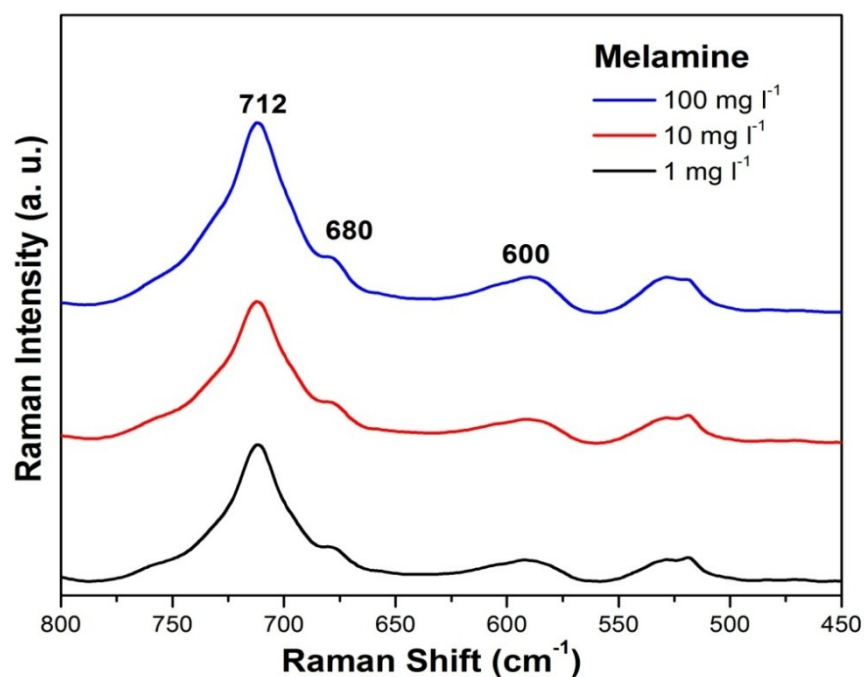

**Fig. S3** Raman spectra recorded from post. Leaned nanowires substrates after their immersion for 20 minutes in Mel solutions at 100 mg l<sup>-1</sup>, 10 mg l<sup>-1</sup> and 1 mg l<sup>-1</sup>. SiNWs substrates were intensively washed with water to remove non-adsorbed molecules and let them dry in air to induce water evaporation as well as leaning of the wires before performing Raman measurements.

#### S.4 Enhancement Factor

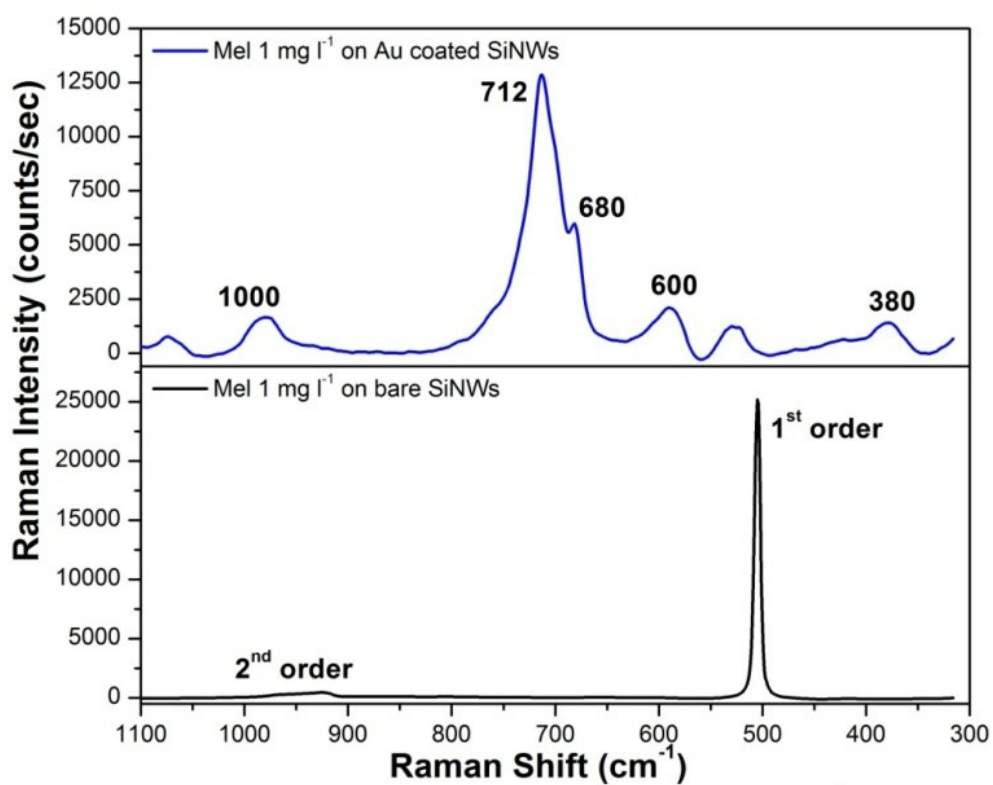

**Fig. S4** Raman spectra recorded from Au coated SiNWs and bare SiNWs after the deposition of a 1  $\mu$ l droplet of a Mel solution at 1 mg l<sup>-1</sup>. Raman measurements were performed in air after the evaporation of the solvent.
